# Supplementary material for: Insights into the Natural Defenses of a Coral Reef Fish Against Gill Ectoparasites: Integrated Metabolome and Microbiome Approach
Source: Metabolites. 2020 May 30;10(6):227. doi: 10.3390/metabo10060227 (PMC7345202; doi:10.3390/metabo10060227)
Supplement: Supplementary file 1 [file metabolites-10-00227-s001.zip]

Archive with 4 entries (3 files):
- supplementary/
- supplementary/Supplementary Data-Reverter et al..pdf
- supplementary/Supplementary material 1.pdf
- supplementary/Supplementary table 1 - Acid-extract-nanoLC-MS-MS protein identification report.xlsx
