# Supplementary material for: Insights into the Natural Defenses of a Coral Reef Fish Against Gill Ectoparasites: Integrated Metabolome and Microbiome Approach
Source: Metabolites. 2020 May 30;10(6):227. doi: 10.3390/metabo10060227 (PMC7345202; doi:10.3390/metabo10060227)
Supplement: Supplementary file 1 [file metabolites-10-00227-s001.zip › supplementary/Supplementary table 1 - Acid-extract-nanoLC-MS-MS protein identification report.xlsx]

## Sheet: Sheet1
Protein results	Associated peptide results										Mascot results				Sequest results
Accession	Description	ΣCoverage	Σ# Proteins	Σ# Unique Peptides	Σ# Peptides	Σ# PSMs	Molecular Function	Cellular Component	Biological Process	Gene IDs	Score A2	Coverage A2	# Peptides A2	# PSM A2	Score A3	Coverage A3	# Peptides A3	# PSM A3	# AAs	MW [kDa]	calc. pI
Q9PVM1	Hemoglobin subunit beta-B OS=Seriola quinqueradiata GN=hbb2 PE=2 SV=3 - [HBBB_SERQU]	21.62	106	5	5	40	transporter activity; metal ion binding		transport		159.39	21.62	2	4	95.047	21.62	5	36	148	16.3184	8.45557
	Sequence	# PSMs	# Proteins	# Protein Groups	Protein Group Accessions	Modifications	MH+ [Da]	A2	IonScore A2	Exp Value A2	A3	XCorr A3	# Missed Cleavages	Charge A2	m/z [Da] A2	RT A2	Charge A3	m/z [Da] A3	RT A3
	AAITSLWGKIDVGEIGPQALTR	2	1	1	Q9PVM1		2296.26	High	98.22	3.28426e-06	High	5.98725	0	3	766.092	14.6397	3	766.092	14.6397
	LLIVYPWTQR	23	66	1	Q9PVM1		1288.74	High	61.17	0.00806664	High	2.89134	0	2	644.873	14.2655	2	644.873	14.1855
	WGKIDVGEIGPQALTR	1	2	1	Q9PVM1		1739.94				High	3.23606	0				3	580.652	13.0644
	LIVYPWTQR	13	104	1	Q9PVM1		1175.66				High	2.69561	0				2	588.332	13.2443
	IVYPWTQR	1	106	1	Q9PVM1		1062.57				High	1.9696	0				2	531.79	12.6046
P08853	Hemoglobin subunit beta OS=Marmota marmota marmota GN=HBB PE=1 SV=1 - [HBB_MARMA]	7.53	1	1	1	7	transporter activity; metal ion binding		transport			0			16.0729	7.53	1	7	146	15.7261	8.19189
	Sequence	# PSMs	# Proteins	# Protein Groups	Protein Group Accessions	Modifications	MH+ [Da]	A2	IonScore A2	Exp Value A2	A3	XCorr A3	# Missed Cleavages	Charge A2	m/z [Da] A2	RT A2	Charge A3	m/z [Da] A3	RT A3
	AADIGAEALGR	7	1	1	P08853		1043.55				High	2.69711	0				2	522.277	10.4552
P07410	Hemoglobin subunit beta-S/F OS=Urocitellus townsendii PE=1 SV=1 - [HBB_UROTO]	7.53	1	1	1	10	transporter activity; metal ion binding		transport			0			25.074	7.53	1	10	146	15.7701	8.19189
	Sequence	# PSMs	# Proteins	# Protein Groups	Protein Group Accessions	Modifications	MH+ [Da]	A2	IonScore A2	Exp Value A2	A3	XCorr A3	# Missed Cleavages	Charge A2	m/z [Da] A2	RT A2	Charge A3	m/z [Da] A3	RT A3
	AAEIGAEALGR	10	1	1	P07410		1057.56				High	2.76461	0				2	529.285	10.5924
A7H491	Glucose-6-phosphate isomerase OS=Campylobacter jejuni subsp. doylei (strain ATCC BAA-1458 / RM4099 / 269.97) GN=pgi PE=3 SV=1 - [G6PI_CAMJD]	5.48	1	1	1	1	catalytic activity	cytoplasm	metabolic process	5390467					3.54251	5.48	1	1	547	62.4171	7.81104
	Sequence	# PSMs	# Proteins	# Protein Groups	Protein Group Accessions	Modifications	MH+ [Da]	A2	IonScore A2	Exp Value A2	A3	XCorr A3	# Missed Cleavages	Charge A2	m/z [Da] A2	RT A2	Charge A3	m/z [Da] A3	RT A3
	ITDVVNIGIGGSDLGALMVCKALKNYAHPR	1	1	1	A7H491		3125.66				High	3.54251	0				4	782.17	15.5852
E1BLZ4	Zinc finger FYVE domain-containing protein 26 OS=Bos taurus GN=ZFYVE26 PE=3 SV=1 - [ZFY26_BOVIN]	1.15	1	1	1	1	metal ion binding	cytoplasm; membrane; cytoskeleton	metabolic process; response to stimulus; cell division	514402					2.86839	1.15	1	1	2515	280.177	6.32861
	Sequence	# PSMs	# Proteins	# Protein Groups	Protein Group Accessions	Modifications	MH+ [Da]	A2	IonScore A2	Exp Value A2	A3	XCorr A3	# Missed Cleavages	Charge A2	m/z [Da] A2	RT A2	Charge A3	m/z [Da] A3	RT A3
	LEQLLMNMKVDWAAVAVQTLRQLLAGQEI	1	1	1	E1BLZ4		3281.76				High	2.86839	0				5	657.158	15.1825
